# Supplementary material
Source: Springer Nature journal article supplement (https://www.springermedizin.de/resource/supplementary/12880_2006_9_MOESM1_ESM.pdf/9450402)
Supplement: MOESM1 [file 9450402]

Potentially relevant studies identified and screened for retrieval  
N=1437

Studies rejected at title  
N=1126

Total abstracts screened  
N=311

Studies rejected at abstract  
N=139

Total full papers screened  
N= 172 (plus 4 from other sources)

Rejected full papers  
N=105

Studies potentially relevant  
N=67

Studies excluded on the basis of quality  
N=38

Included studies  
N=28 (plus 1 study of patient satisfaction)
